# Supplementary material
Source: publisher figshare collection journal article supplement (https://tandf.figshare.com/articles/dataset/_/21829482)
Supplement: Supplementary file 1 [file 1]

## **Tratamiento basado en la evidencia para mujeres adultas con TEPT complejo relacionado con abuso infantil: Una revisión cuantitativa.**

Kathleen Thomaes, Ethy Dorrepaal, Adriaan W Hoogendoorn, Dick J Veltman, Nel Draijer, Anton J van Balkom

**Introducción:** Existen tratamientos de primera línea efectivos para el TEPT que están bien establecidos, pero su capacidad de generalización al TEPT complejo relacionado con el abuso infantil (AI) es desconocido.

**Método:** Se realizó una revisión cuantitativa de la literatura, identificando siete estudios, con tratamientos dirigidos específicamente al TEPT o al TEPT complejo relacionado con el AI, que fueron meta-analizados, incluyendo variables como tamaño del efecto, tasa de abandono, recuperación y mejoría.

**Resultados:** Sólo seis estudios con una o más condiciones de tratamiento de TCC y uno con una condición de terapia centrada en el presente pudieron ser meta-analizados. Los resultados indican que los pacientes de TEPT relacionado con el AI se benefician con amplios tamaños del efecto y tasas modestas de recuperación y mejoría. Los tratamientos que incluyen exposición muestran mayores tamaños del efecto especialmente en el análisis de aquellos que completan el tratamiento, aunque no se encuentran resultados diferenciales en las tasas de recuperación y mejoría. Sin embargo, los resultados del subgrupo de los estudios de TEPT complejo relacionado con el AI fueron menos favorables. Dentro de subgrupo de TEPT complejo no se encontró un tamaño superior del efecto para la exposición y la gestión del afecto resultó en unas tasas de recuperación y mejoría más favorables y menos abandono, en comparación con la exposición, especialmente en análisis de intención de tratamiento.

**Conclusión:** la limitada evidencia sugiere que predominantemente los tratamientos de TCC son eficaces, pero no son suficientes para lograr estados finales satisfactorios, especialmente en poblaciones de TEPT complejo. Es más, proponemos que las futuras investigaciones deberían centrarse en comparaciones directas entre los tipos de tratamiento para pacientes de TEPT complejo, aumentando por tanto la capacidad de generalización de los resultados.

**Keywords:** Revisión, meta-análisis, TEPT, trastorno de estrés postraumático, psicoterapia, terapia cognitiva conductual, tratamiento cognitivo conductual, abuso infantil, abuso en la infancia, sobrevivientes adultos de abuso infantil

Name of translator: Miriam Ramos Morrison

Citation: European Journal of Psychotraumatology 2014, 5: 23613 - <http://dx.doi.org/10.3402/ejpt.v5.23613>
