# Supplementary material
Source: publisher figshare collection journal article supplement (https://tandf.figshare.com/articles/dataset/_/21829482)
Supplement: Supplementary file 3 [file 1]

## **Çocukluk çağı istismarına bağlı Karmaşık TSSB tanılı yetişkin kadınlar için kanıta dayalı terapi: Nicel bir gözden geçirme**

Kathleen Thomaes, Ethy Dorrepaal, Adriaan W Hoogendoorn, Dick J Veltman, Nel Draijer, Anton J van Balkom

**Giriş:** TSSB için geliştirilen başlangıç tedavileri iyi yapılandırılmış olsa da çocukluk çağı istismarına bağlı karmaşık TSSB'ye genellenebilirliği büyük ölçüde bilinmemektedir.

**Yöntem:** Özellikle çocukluk çağı istismarına bağlı TSSB veya karmaşık TSSB'yi hedef alan tedavi yöntemlerinin kullanıldığı 7 çalışma belirlenip etki büyüklüğü, tedaviyi bırakma oranları, iyileşme ve düzelme oranları gibi değişkenlerin de dahil edildiği bir meta analize tabi tutularak literatürün nicel bir değerlendirmesi yapılmıştır.

**Sonuçlar:** Sadece, bir veya daha fazla Bilişsel Davranışçı Terapi koşulunun bulunduğu altı çalışma ve Şimdiki Zaman Odaklı Terapi (Present Centered Therapy) koşulunun bulunduğu bir çalışma meta analize tabi tutulabilmiştir. Sonuçlara göre, çocukluk çağı istismarına bağlı TSSB hastaları tedavilerden büyük etki büyüklüğü, ortalama iyileşme ve düzelme oranları ile faydalanmışlardır. Maruz bırakma içeren tedaviler, iyileşme ve düzelme oranlarında ayırıcı bir fark bulunmamasına rağmen, özellikle tedaviyi tamamlayanlarda uygulanan analizlere göre büyük etki büyüklüğü göstermiştir. Ancak, çocukluk çağı istismarına bağlı karmaşık TSSB alt grup araştırmalarının sonuçları çok düşük uygunluk göstermiştir. Karmaşık TSSB alt grubunda maruz bırakmanın daha yüksek bir etki büyüklüğü bulunmamakla beraber, özellikle tedavi amaçlı analizlerde duygu yönetimi maruz bırakmaya kıyasla daha elverişli iyileşme ve düzelme ve daha düşük tedaviyi bırakma oranları ile sonuçlanmıştır.

**Tartışma:** Kısıtlı bulgular ağırlıklı olarak BD tedavilerin etkili olduğunu ortaya koymaktadır, ancak, özellikle karmaşık TSSB popülasyonunda tatmin edici nihai durumlar elde etmede yeterli değildirler. Bunun yanı sıra, gelecekteki araştırmaların farklı türdeki tedavilerin karmaşık TSSB hastaları üzerindeki doğrudan etkisine odaklanmasını ve böylelikle, bulguların genellenebilirliğinin artırılmasını öneriyoruz.

**Anahtar Kelimeler:** Gözden geçirme; Meta-analiz; TSSB; Travma Sonrası Stres Bozukluğu; Psikoterapi; Bilişsel davranışçı terapi; Bilişsel davranışçı tedavi; Çocuk istismarı; Çocukluk çağı istismarı; Çocuk istismarı yaşamış yetişkinler.

Name of translator: Emek Yuce Zeyrek-Rios

Citation: European Journal of Psychotraumatology 2014, 5: 23613 - <http://dx.doi.org/10.3402/ejpt.v5.23613>
