# Supplementary material
Source: publisher figshare collection journal article supplement (https://tandf.figshare.com/articles/dataset/_/21829482)
Supplement: Supplementary file 4 [file 1]

## **Evidence-based treatment for adult women with child abuse-related Complex PTSD: a quantitative review**

Kathleen Thomaes, Ethy Dorrepaal, Adriaan W Hoogendoorn, Dick J Veltman, Nel Draijer, Anton J van Balkom

Oparta na danych naukowych terapia dorosłych kobiet z diagnozą złożonego PTSD wywołanego maltretowaniem fizycznym w dzieciństwie: analiza jakościowa

Wprowadzenie: Dotychczas opracowano wiele efektywnych metod leczenia PTSD, natomiast niewiele wiadomo na temat sposobów terapii złożonego PTSD wywołanego maltretowaniem fizycznym w dzieciństwie.

Metoda: Przeprowadzono jakościową metaanalizę siedmiu prac poświęconych sposobom leczenia złożonego PTSD wywołanego maltretowaniem fizycznym w dzieciństwie, identyfikując zmienne związane z efektywnością takiej terapii, częstością wypadania z leczenia oraz stopniem jej efektywności.

Wyniki: Metaanalizie mogło zostać poddanych jedynie sześć prac, w których opisano podejście poznawczo-behawioralne oraz terapię skoncentrowaną na teraźniejszości (ang. Present Centered Therapy). Wyniki wykazały, że największą efektywność miały techniki ekspozycyjne oraz techniki nakierowane na zarządzanie afektem.

Konkluzja: Dotychczasowe prace wskazują, że największą efektywność w leczeniu złożonego PTSD wywołanego maltretowaniem fizycznym w dzieciństwie wykazuje podejście poznawczo-behawioralne. Potrzeba jednak dalszych badań nakierowanych na porównanie skuteczności leczenia tego zaburzenia za pomocą innych podejść terapeutycznych.

Słowa kluczowe: Przegląd, metaanaliza, PTSD, zaburzenie po stresie traumatycznym, psychoterapia, terapia poznawczo-behawioralna, leczenie poznawczo-behawioralne, maltretowanie dziecięce, dorosłe ofiary maltretowania w dzieciństwie.

Name of translator: Marcin Rzeszutek, University of Finance and Management in Warsaw, Poland

Citation: European Journal of Psychotraumatology 2014, 5: 23613 - <http://dx.doi.org/10.3402/ejpt.v5.23613>
